# Supplementary material for: Multiple expansions of globally uncommon SARS-CoV-2 lineages in Nigeria
Source: PubMed Central journal article supplement (PMC8813984; doi:10.1038/s41467-022-28317-5), 2022-02-03
Supplement: 41467_2022_28317_MOESM2_ESM.pdf [file 41467_2022_28317_MOESM2_ESM.pdf]

## **Description of Additional Supplementary Files**

File Name: Supplementary Data 1

Description: Accession numbers, collection dates, and Pango.Lineage associated with the sequences obtained for the study.

File Name: Supplementary Data 2

Description: Accession numbers and collection dates for all GISAID sequences used in this study, and acknowledgement for authors, originating and submitting laboratories. All submitters may be contacted via <https://www.gisaid.org/>
