# Supplementary material for: Multiple expansions of globally uncommon SARS-CoV-2 lineages in Nigeria
Source: PubMed Central journal article supplement (PMC8813984; doi:10.1038/s41467-022-28317-5), 2022-02-03

# SOURCE DATA

## SUPPLEMENTAL FIGURE 8b

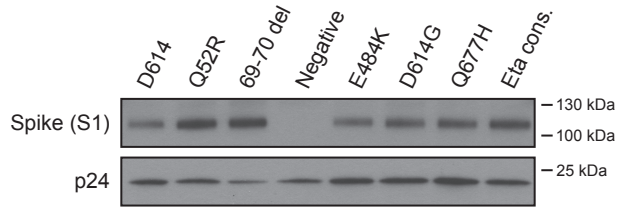

Full scan (anti-Spike S1)

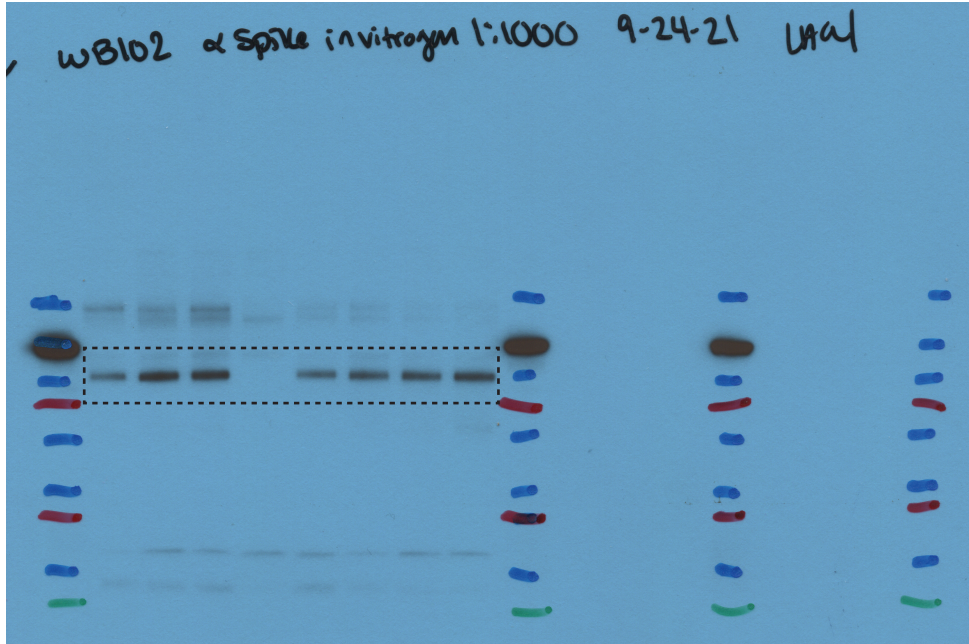

Full scan (anti-p24)

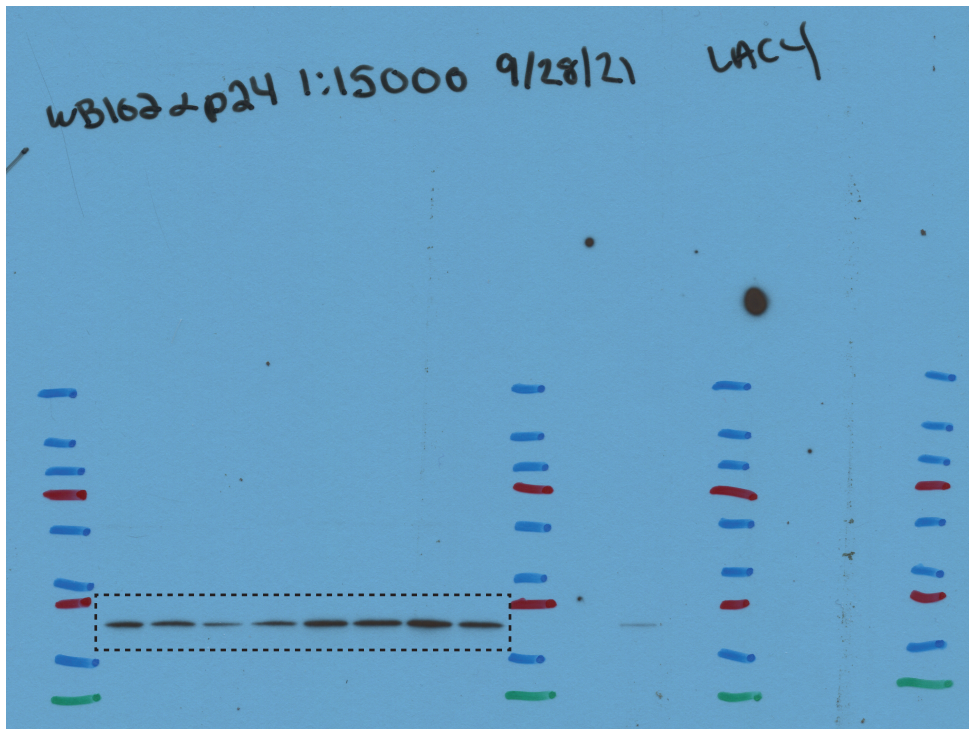

Supplement: 41467_2022_28317_MOESM5_ESM.pdf [file 41467_2022_28317_MOESM5_ESM.pdf]
